# Supplementary material
Source: PubMed Central journal article supplement (PMC5694371)
Supplement: NIHMS912561-supplement.pdf [file NIHMS912561-supplement.pdf]

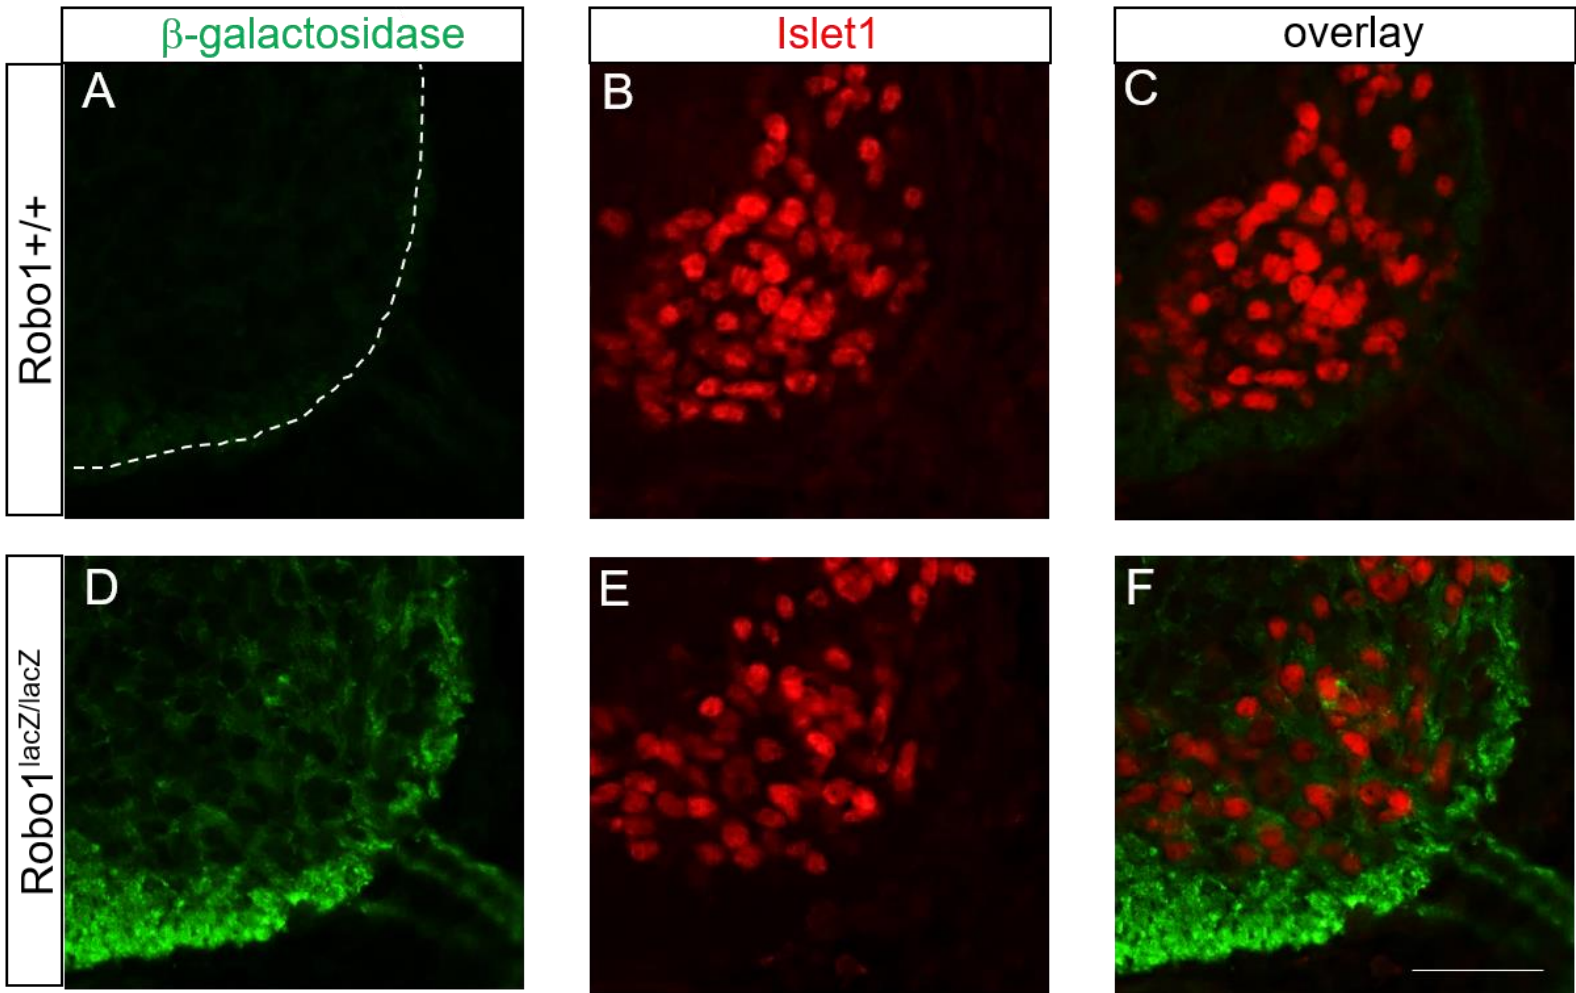

Supple. Fig.1.  $\beta$ -galactosidase is not expressed on wild-type spinal motor neurons and axons.

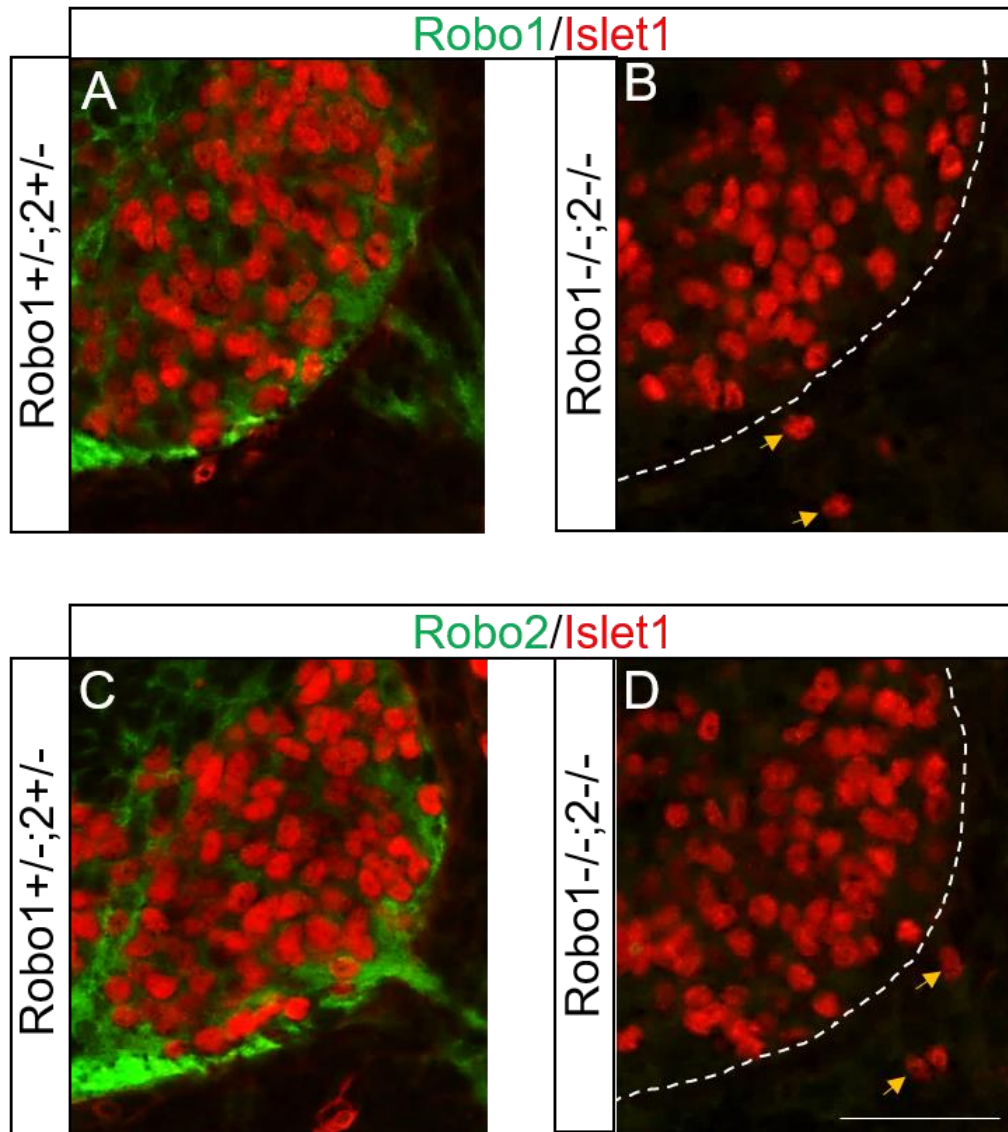

Suppl. Fig. 2. Specificity of Robo antibodies determined by labeling Robo1/2 double mutant.

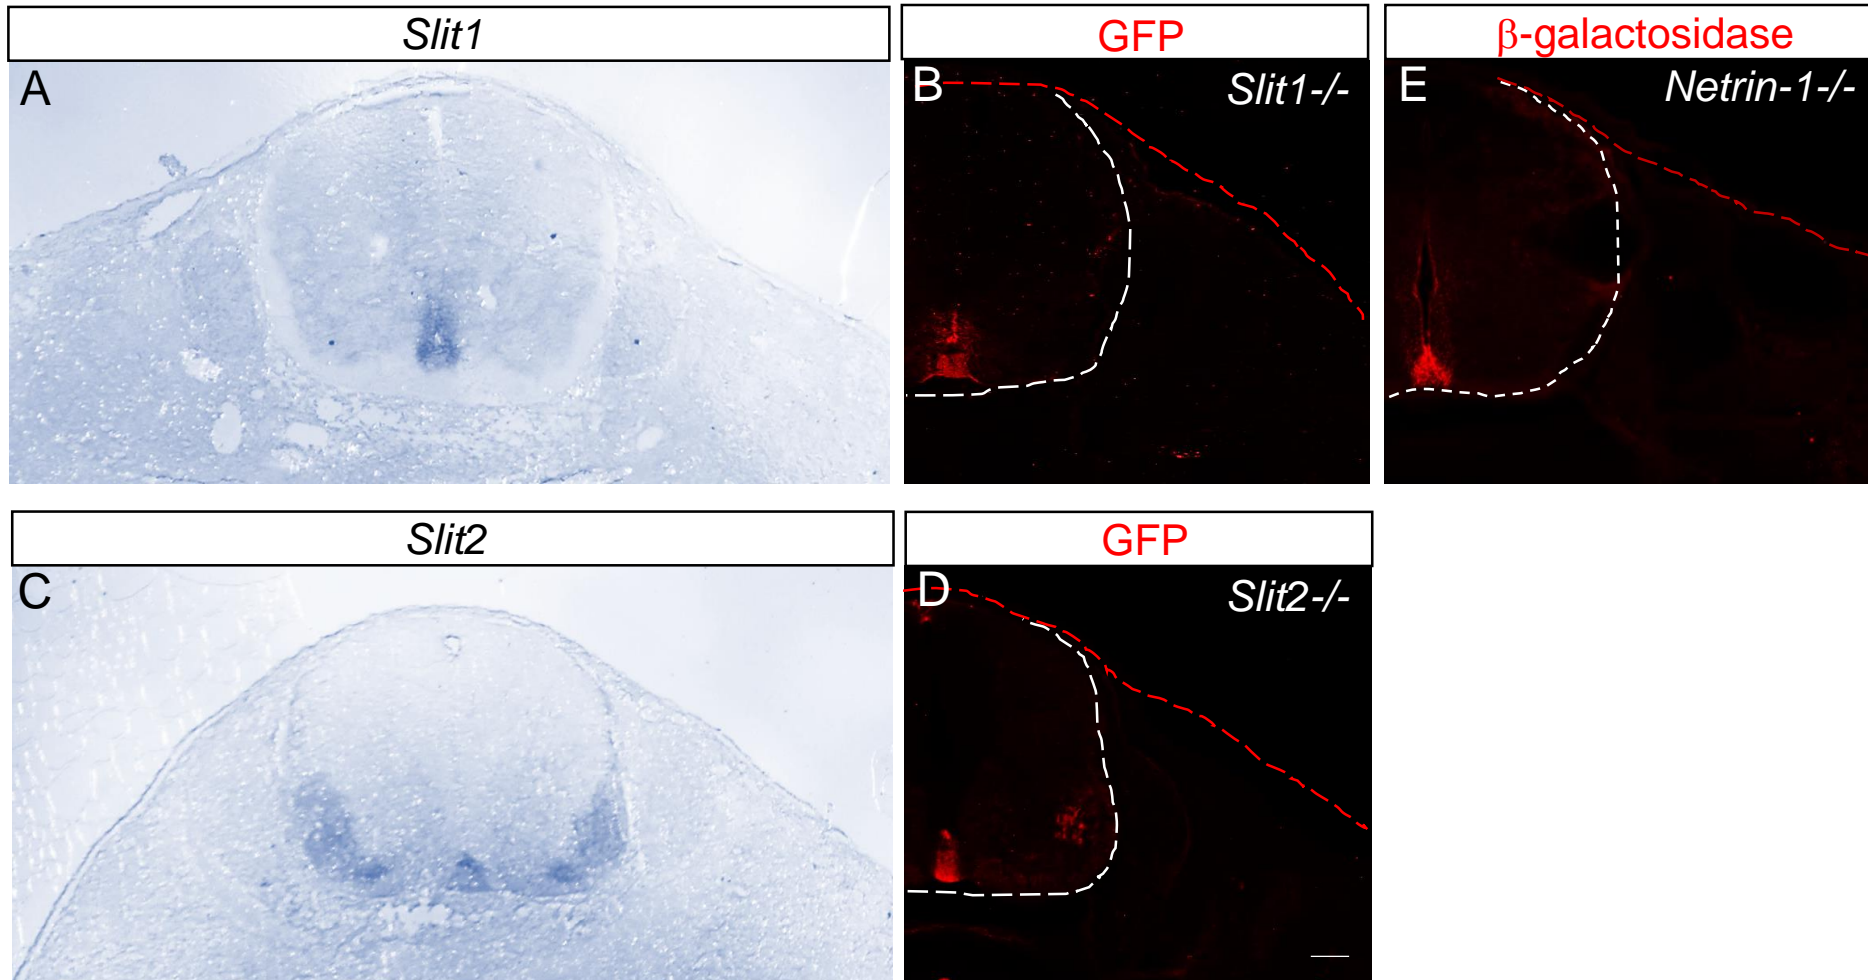

Suppl. Fig.3. Slits and Netrin-1 are mainly expressed on the ventral spinal cord at E12.5.
